# Supplementary material
Source: publisher site journal article supplement (https://www.dovepress.com/article/436750)
Supplement: Supplementary file 1 [file get_supplementary_file.php]

**SUPPLEMENTARY MATERIAL**

**eTable 1**. Summary of Statistical Goodness-of-fit of K-M Curve

|  | **Exponential** | **Gamma** | **Weibull** | **Loglogistic** | **Lognormal** |
| --- | --- | --- | --- | --- | --- |
| **OS curve of** **Tislelizumab plus Chemotherapy** |  |  |  |  |  |
| AIC | 1668.188 | 1651.416 | 1652.594 | 1651.922 | 1659.704 |
| BIC | 1671.975 | 1658.99 | 1660.168 | 1659.496 | 1667.277 |
| **OS curve of Chemotherapy alone** |  |  |  |  |  |
| AIC | 1758.869 | 1745.245 | 1751.007 | 1726.528 | 1729.247 |
| BIC | 1762.647 | 1752.8 | 1758.563 | 1734.083 | 1736.803 |
| **PFS curve of Tislelizumab plus Chemotherapy** |  |  |  |  |  |
| AIC | 1560.35 | 1545.094 | 1553.785 | 1509.712 | 1513.129 |
| BIC | 1564.137 | 1552.668 | 1561.359 | 1517.286 | 1520.703 |
| **PFS curve of Chemotherapy alone** |  |  |  |  |  |
| AIC | 1549.469 | 1521.75 | 1534.12 | 1493.186 | 1490.817 |
| BIC | 1553.247 | 1529.306 | 1541.676 | 1500.742 | 1498.372 |

Abbreviations: OS, overall survival; PFS, progression-free survival; AIC, Akaike information criterion; BIC, Bayesian information criterion.
